# Supplementary material
Source: publisher figshare collection journal article supplement (https://gsapubs.figshare.com/ndownloader/files/29107479)
Supplement: Supplementary file 1 [file 29107479]

## Sheet: Table S4
TableS4. Chemical composition of volcanic glass measured via Electron Microprobe (EMA) of tephra layers discussed in Sarna-Wojcicki and others, this volume, arranged in groups in stratigraphic order from youngest at top (stratigraphic number 32)
to oldest at bottom (stratigraphic number 1). There are 34 tephra layers in total (some numbers are duplicated, followed by a letter, e.g. 18 and 18A). The groups represent those samples considered to be the same tephra layer within each sample
group, based on chemical similarity as well as other stratigraphic or numerical age evidence. The averages and standard deviations of these groups serve as guides for assignment or exclusion of new or other samples into a particular group.
Strat. No.	Comp. #	Sample #	Date anal.	SiO2	Al2O3	Fe2O3	MgO	MnO	CaO	TiO2	Na2O	K2O	T (rec. 100%)
32		Paulina Lakes, Olema, ash bed, ~60 Ka
	4509	COLMA-1 T419-7	1999-11-05	75.79	13.25	1.62	0.09	0.04	0.49	0.17	4.39	4.16	100
	3150	CD10630 T296-6	1993-12-28	74.95	13.59	1.59	0.09	0.05	0.49	0.17	4.94	4.15	100.02
	3865	GL2-3.30 MAJOR T356-9	1997-02-01	75.58	13.62	1.64	0.09	0.05	0.5	0.17	4.26	4.1	100.01
	1282	ASW61585-52B T100-4	1985-07-02	75.72	13.13	1.71	0.09	0.05	0.49	0.17	4.55	4.08	99.99
	3874	GL2-4.40 MAJOR T357-2	1997-02-01	75.49	13.6	1.68	0.1	0.05	0.49	0.17	4.29	4.13	100
	3870	GL2-3.60 LO CA FR T356-10	1997-02-01	75.61	13.57	1.69	0.09	0.04	0.49	0.17	4.23	4.11	100
	3881	GL2-7.24 MAJOR T357-5	1997-02-01	75.63	13.59	1.69	0.09	0.05	0.49	0.17	4.17	4.12	100
	3879	GL2-5.76 MAJOR T357-4	1997-02-01	75.59	13.57	1.67	0.09	0.04	0.48	0.17	4.27	4.13	100.01
	4593	GL-17177B T437-3	2000-03-02	75.71	13.29	1.65	0.09	0.04	0.49	0.16	4.51	4.05	99.99
	4752	RSA_CORE_A_DRIVE_10 T464-3	2001-06-27	75.38	13.13	1.67	0.1	0.05	0.51	0.17	4.83	4.17	100.01
	1391	ASW 61485-38B T109-10	1985-09-24	75.58	13.16	1.65	0.12	0.05	0.52	0.17	4.67	4.08	100
	5980	CL-1	2013-04-29	75.15	13.68	1.71	0.08	0.04	0.49	0.17	4.6	4.08	100
	3834	CD2-12.81M T354-6	1997-01-01	75.46	13.57	1.7	0.1	0.04	0.48	0.17	4.44	4.04	100
	3478	RC21 T317-9 R HICA,FE	1995-04-11	74.8	13.77	1.7	0.1	0.05	0.49	0.17	4.7	4.23	100.01
	4	AH-4(2), T15-10	ND	75.24	13.67	1.69	0.11	0.06	0.5	0.17	4.49	4.06	99.99
	6020	T4Sta34.05 (pop3) T596-2	2013-09-24	75.13	13.63	1.73	0.08	0.05	0.49	0.17	4.83	3.9	100.01
	4356	SK-98-31 T399-1	1998-10-21	75.51	13.16	1.64	0.09	0.04	0.48	0.16	4.76	4.15	99.99
	3886	GL2-29.38 MAJOR T357-9	1997-02-01	75.63	13.64	1.66	0.1	0.05	0.49	0.16	4.15	4.12	100
	5987	SK-98-31 T590-7, Paulina Lakes, proximal	2012-05-21	75.16	13.62	1.69	0.1	0.06	0.51	0.17	4.41	4.27	99.99
	2054	NC-88-ST T170-2	1988-09-03	75.16	13.28	1.7	0.09	0.04	0.49	0.16	5.02	4.07	100.01
	3858	GL1-0.435 LO CA T356-6	1997-02-01	75.37	13.65	1.65	0.08	0.05	0.48	0.16	4.47	4.09	100
	2886	GL-3508 T266-4	1992-09-18	75.16	13.26	1.72	0.09	0.05	0.48	0.18	4.92	4.15	100.01
	1394	ASW-61485-38E T109-13	1985-09-24	75.87	12.97	1.65	0.08	0.04	0.52	0.16	4.47	4.24	100
	3862	GL2-1.55 POP2 T356-7	1997-02-01	75.5	13.58	1.71	0.09	0.05	0.48	0.16	4.32	4.11	100
	4254	CD-2-11.98-12.3M-POP1 T388-9	1998-07-01	75.7	13.23	1.69	0.1	0.04	0.49	0.15	4.45	4.14	99.99
	2679	JW-72003 T236-7	1991-09-28	75.86	12.82	1.71	0.12	0.05	0.48	0.18	4.66	4.12	100
	3170	CD10605 (hife) T298-4 (2)	1994-02-14	74.92	13.74	1.68	0.09	0.04	0.48	0.16	4.82	4.06	99.99
	498	T60-1 ASH HOLE 4	1983-08-16	75.25	13.37	1.74	0.11	0.06	0.48	0.16	4.68	4.14	99.99
	1285	ASW61585-52C less silicic frac	1985-07-02	75.64	13.25	1.66	0.07	0.07	0.51	0.19	4.57	4.05	100.01
	2701	LM-LBC T245-3	1991-11-27	75.63	13.15	1.68	0.09	0.06	0.48	0.19	4.65	4.08	100.01
	3	AH-4(1), T7-1, pd	ND	75.26	13.6	1.7	0.08	0.05	0.51	0.18	4.57	4.04	99.99
	3877	GL2-4.98 MAJOR T357-3	1997-02-01	75.52	13.6	1.69	0.09	0.05	0.49	0.15	4.27	4.15	100.01
	3871	GL2-3.94 POP1 T357-1	1997-02-01	75.57	13.6	1.7	0.09	0.04	0.49	0.15	4.28	4.08	100
	350	SKIN-1, T8-3		75.44	13.37	1.69	0.09	0.04	0.47	0.19	4.54	4.16	99.99
	3863	GL2-2.10 POP1 T356-8	1997-02-01	75.56	13.66	1.64	0.09	0.03	0.47	0.15	4.25	4.14	99.99
		Mean 35		75.4434	13.4391	1.67971	0.0928571	0.0474286	0.490571	0.167714	4.52657	4.11286	100
		1 sigma		0.268042	0.242867	0.0321289	0.0107297	0.0081684	0.0125892	0.0105957	0.233905	0.0660023	0.00857003
31		Bend Pumice, Loleta, ash bed, ~435 Ka
	659	BPT-1, T68-5	1983-12-16	74.85	13.72	1.94	0.11	0.07	0.74	0.14	5.09	3.34	100
	4440	RE98LC-Q277 T408-6	1999-05-30	74.67	13.89	1.92	0.11	0.07	0.75	0.14	5.23	3.23	100.01
	515	CL-0519(200-325), T63-13	1983-09-07	75.17	13.49	1.89	0.11	0.07	0.75	0.14	5.11	3.28	100.01
	2847	BL-3487 T262-2	1992-07-29	74.44	13.91	1.92	0.11	0.05	0.75	0.13	5.52	3.16	99.99
	4456	JEO_7-16-98-2(2)_POP1 T411-2	1999-06-22	74.69	13.7	1.85	0.11	0.07	0.8	0.14	5.11	3.55	100.02
	92	DSDP-36-1-5(88cm), T47-5	ND	74.38	14.06	1.91	0.12	0.05	0.74	0.14	5.44	3.15	99.99
	514	CL-0519(100-200), T60-9	1983-08-16	74.69	14.06	1.96	0.12	0.07	0.75	0.14	5.05	3.18	100.02
	1076	DSDP 36-1-6 T77-8	1984-07-30	74.82	13.63	1.95	0.11	0.08	0.79	0.15	5.22	3.25	100
	91	DSDP-36-1-5(57cm), T47-4	ND	74.21	14.07	1.98	0.12	0.06	0.73	0.14	5.42	3.27	100
	61	CRANNEL ASH-1, T23-13	ND	74.58	13.86	1.96	0.12	0.03	0.78	0.14	5.35	3.18	100
	6309	DSDP 36-1-5_57-59 T47-4J	2016-06-23	75.23	14.44	1.97	0.12	0.08	0.77	0.14	4.09	3.16	100
	4458	JEO_9-29-98-1(1) T411-3	1999-06-22	74.82	13.58	1.81	0.1	0.06	0.76	0.14	4.95	3.78	100
	351	SM-ASH-04, T11-7	ND	74.69	13.92	1.93	0.11	0.06	0.73	0.17	5.18	3.21	100
	5981	DWR-DCRA-005-187.5 T593-8	2013-05-07	74.34	14.12	1.91	0.1	0.06	0.76	0.15	5.32	3.24	100
	5396	BPT-1 T530-2	2005-09-07	74.68	13.81	1.9	0.12	0.07	0.75	0.16	5.22	3.29	100
	6310	DSDP 36-1-5_88-98 T47-5J	2016-06-23	75.3	14.32	2.01	0.12	0.05	0.76	0.13	4.17	3.14	100
	2846	BL-3485 T262-1	1992-07-29	74.37	13.96	1.96	0.12	0.06	0.76	0.12	5.42	3.24	100.01
	352	SM-ASH-05, T11-8	ND	74.74	13.86	1.92	0.1	0.06	0.74	0.17	5.28	3.14	100.01
	3118	BV-7567 T292-2	1993-12-17	73.02	14.75	1.93	0.11	0.07	0.87	0.15	5.38	3.72	100
	1497	GA18V184-1 T80-3	1984-07-20	74.85	13.72	1.98	0.13	0.07	0.8	0.15	4.77	3.53	100
	5929	DCA-DH-037-174.1 T587-9	2012-01-25	75.88	14.37	1.89	0.13	0.07	0.81	0.15	3.66	3.05	100.01
	6312	DSDP 36-1-6_100-102 T77-8J	2016-06-23	74.82	14.19	1.97	0.14	0.09	0.79	0.13	4.54	3.33	100
		Mean 22		74.6927	13.9741	1.93	0.115455	0.0645455	0.767273	0.143636	5.02364	3.29182	100.003
		1 sigma		0.514774	0.306045	0.0456696	0.0101076	0.0126217	0.0326864	0.0121677	0.490321	0.189175	0.00779888
30		Rockland ash bed, ~600 Ka
	172	KA-1, T2-3	ND	77.62	12.82	0.9	0.16	0.03	0.88	0.15	4	3.43	99.99
	331	RRG-2, T46-5	ND	77.84	12.67	0.89	0.16	0	0.84	0.15	3.95	3.5	100
	1377	ASW-61085-18 T108-5	1985-09-24	77.69	12.84	0.9	0.16	0.01	0.91	0.15	3.78	3.55	99.99
	421	WO-1, T2-2	ND	77.61	12.82	0.86	0.16	0.03	0.83	0.15	3.99	3.55	100
	3130	WM-B631 T293-5	1993-12-17	77.45	12.79	0.88	0.17	0.03	0.88	0.15	4.04	3.61	100
	340	SAM-10B, T40-5	ND	77.8	12.74	0.88	0.16	0.02	0.82	0.15	3.91	3.52	100
	987	RC-7	ND	77.94	12.74	0.88	0.17	0.03	0.87	0.15	3.81	3.41	100
	346	SC-6, 22-May-81	5//22/81	78.01	12.71	0.9	0.16	0.03	0.9	0.15	3.58	3.56	100
	206	LMT-3, T2, N-ASW-53	ND	77.78	12.79	0.89	0.18	0.02	0.9	0.15	3.94	3.35	100
	3143	WM-7780 T294-8	1993-12-18	77.61	12.78	0.87	0.17	0.03	0.87	0.15	3.87	3.66	100.01
	5983	DWR-DCN4-028-140.0 T593-7	2013-05-07	77.78	12.73	0.84	0.16	0.03	0.88	0.15	3.75	3.67	99.99
	347	SC-7	1981-05-22	78.15	12.64	0.87	0.16	0.07	0.86	0.15	3.57	3.53	100
	3000	JY-92-11 T277-11	1993-05-03	77.46	12.93	0.86	0.17	0.04	0.85	0.15	3.93	3.61	100
	5986	DWR-DCR5-013-151.55 T539-10	2013-05-07	77.76	12.64	0.91	0.15	0.04	0.88	0.15	3.78	3.7	100.01
	164	JOD-20-6-78A(1), LAH-3, T11-12	ND	77.78	12.77	0.86	0.16	0.03	0.86	0.16	3.78	3.6	100
	224	MMC-2, T2-4	ND	77.66	12.76	0.86	0.17	0.03	0.87	0.16	3.93	3.57	100.01
	1041	JOD 19-7-83A, T78-2	1984-07-18	77.92	12.5	0.88	0.17	0.02	0.85	0.15	3.86	3.65	100
	1263	*TULE LAKE 2122 T94-1	1985-05-28	78.08	12.43	0.85	0.16	0.02	0.83	0.16	3.97	3.51	100.01
	3005	JY-92-62 T278-4	1993-05-03	77.45	12.93	0.83	0.17	0.04	0.86	0.15	3.92	3.66	100.01
	593	SC-5(2), T62-14	1983-08-25	78.02	12.45	0.87	0.18	0.04	0.87	0.15	3.88	3.55	100.01
	2535	BEC-2 T224-2	1991-04-22	77.61	12.91	0.89	0.17	0.04	0.88	0.17	3.84	3.5	100.01
	1176	RLA-WOL t89-5	1985-02-28	77.81	12.68	0.86	0.17	0.03	0.89	0.14	3.88	3.54	100
	989	RC-10	ND	77.78	12.83	0.89	0.17	0.03	0.83	0.16	3.81	3.51	100.01
	3370	JY-91-6 T314-9	1994-11-23	77.44	12.82	0.91	0.17	0.03	0.89	0.17	3.96	3.62	100.01
	329	RPT(M)8, T1, N-ASW-11	ND	78.32	12.17	0.87	0.16	0.02	0.9	0.15	3.7	3.71	100
	1882	FHS-87-2A T150-2	1987-11-09	78.04	12.61	0.88	0.16	0.04	0.87	0.16	3.61	3.62	99.99
	1130	T1245 (Tulelake) T84-7 v. him	1984-12-03	78.14	12.36	0.87	0.17	0.04	0.86	0.16	3.89	3.51	100
	3138	JY-92-79 T294-4	1993-12-18	77.5	12.76	0.87	0.17	0.02	0.88	0.17	4.02	3.61	100
	961	DR-75	ND	77.76	12.73	0.89	0.17	0.02	0.85	0.16	3.81	3.61	100
	5340	ADB-OM-T1 T524-1	2020-03-07	77.48	12.76	0.84	0.16	0.03	0.79	0.15	4.05	3.75	100.01
	5982	DWR-DCR3-013-133.75 T539-6	2013-05-07	77.9	12.79	0.86	0.16	0.03	0.89	0.16	3.6	3.62	100.01
	2534	BEC-1 T224-1	1991-04-22	77.7	12.82	0.87	0.18	0.03	0.9	0.16	3.86	3.47	99.99
	1264	*TULE LAKE 2123 T94-2	1985-05-28	77.99	12.5	0.85	0.16	0.02	0.85	0.17	3.94	3.52	100
	5984	DWR-DCR5-013-136.0 T593-9	2013-05-07	77.91	12.72	0.89	0.15	0.03	0.88	0.16	3.66	3.6	100
	4397	RPT(M)20 T401-6	1998-12-03	78.04	12.5	0.89	0.17	0.02	0.87	0.15	3.63	3.73	100
	619	TULELAKE-291(2), T62-11	1983-08-25	78.21	12.43	0.87	0.17	0.04	0.85	0.16	3.8	3.47	100
	1132	T1403 (Tulelake) T84-9 v. hom	1984-12-03	78.17	12.29	0.88	0.17	0.03	0.86	0.16	3.86	3.57	99.99
	328	RPT(M)7, T2, N-ASW-93	ND	77.78	12.77	0.87	0.17	0.03	0.89	0.16	3.72	3.61	100
	2764	#4074 T251-1	1992-02-27	77.76	12.58	0.88	0.17	0.02	0.88	0.17	3.93	3.63	100.02
	1881	FHS-87-2 T150-1	1987-11-09	78.27	12.44	0.85	0.17	0.04	0.86	0.15	3.66	3.55	99.99
	345	SC-5, 22-May-81	1981-05-22	78.07	12.61	0.91	0.17	0.05	0.96	0.15	3.59	3.49	100
	330	RRG-1, T9-1	ND	77.73	12.77	0.86	0.16	0.03	0.86	0.18	3.88	3.53	100
	2999	JY-92-9 T277-6	1993-05-03	77.36	12.97	0.86	0.17	0.03	0.85	0.16	3.93	3.68	100.01
	326	RPT(L)15, pum. dk. bulk, T46-7		77.65	12.68	0.93	0.17	0.02	0.93	0.16	3.83	3.62	99.99
			Mean 44	77.8143	12.6814	0.875455	0.166136	0.0297727	0.87	0.156136	3.83409	3.57409	100.001
			1 sigma	0.244525	0.178059	0.0208488	0.00689317	0.0110997	0.0293337	0.00813145	0.132881	0.0853534	0.00734243
29		Lava Creek B ash bed, ~630 Ka
	385	TECO-30A, T17-7	ND	76.21	12.66	1.58	0.02	0.04	0.55	0.12	3.64	5.19	100.01
	3683	JRK-DV-77 #2 T339-9	1996-11-01	76.5	12.51	1.56	0.03	0.03	0.54	0.12	3.39	5.32	100
	389	TECO-30D, T17-11	ND	75.95	12.76	1.64	0.02	0.03	0.55	0.12	3.44	5.49	100
	386	TECO-30B-1, T17-8	ND	76.44	12.46	1.57	0.02	0.04	0.53	0.12	3.52	5.3	100
	5272	ORNA-1 T515-2	2004-08-24	76.67	12.41	1.58	0.02	0.03	0.53	0.12	3.57	5.06	99.99
	2072	CDH-D86-11B T172-3	1988-09-28	76.8	12.34	1.6	0.02	0.03	0.54	0.12	3.51	5.05	100.01
	5274	CDH-D56-11B T515-4	2004-08-24	76.63	12.43	1.65	0.03	0.04	0.55	0.12	3.58	4.97	100
	3494	JRK-DV-5 T323-4	1995-05-06	76.46	12.32	1.57	0.02	0.05	0.53	0.12	3.36	5.57	100
	4247	PC-EQ-1 T385-1	1998-05-01	76.52	12.24	1.55	0.02	0.03	0.54	0.12	3.88	5.09	99.99
	1446	ORNA-1 T116-4	1985-01-27	76.79	12.27	1.58	0.02	0.03	0.53	0.12	3.61	5.07	100.02
	1455	ORNA-1 T116-4	1985-01-27	76.79	12.27	1.58	0.02	0.03	0.53	0.12	3.61	5.07	100.02
	4878	RK-SVR6_ALL T476-6	2002-04-02	76.75	12.09	1.62	0.02	0.03	0.55	0.12	3.77	5.04	99.99
	6102	MV-133A (Redwine UNR)	2015-06-01	76.9	12.23	1.55	0.02	0	0.56	0.12	3.19	5.44	100.01
	630	TULELAKE-329, T61-9	1983-08-17	76.5	12.45	1.66	0.02	0.05	0.54	0.12	3.6	5.06	100
	4197	PC-DQ-1 T384-10	1998-04-01	76.23	12.38	1.57	0.02	0.03	0.55	0.11	3.93	5.17	99.99
	390	TECO-30E, T17-12	ND	76.14	12.58	1.6	0.02	0.04	0.54	0.13	3.51	5.44	100
	4671	BL-00-47E T457-2	2001-01-18	76.83	12.3	1.54	0.02	0.04	0.52	0.12	3.55	5.08	100
	4512	IV-NIEP-5 T419-4	1999-11-05	77.33	11.93	1.55	0.02	0.06	0.53	0.12	3.34	5.13	100.01
	6024	JRK-DV-56 T599-10	2013-12-16	76.58	12.53	1.61	0.01	0.04	0.54	0.13	3.53	5.03	100
	2848	BL-3488 T262-3	1992-07-29	75.94	13.18	1.55	0.06	0.04	0.59	0.12	4.95	3.56	99.99
	388	TECO-30C, T17-10	ND	76.24	12.63	1.63	0.02	0.05	0.56	0.11	3.55	5.21	100
	292	PICO-133C, T35-1	ND	75.71	12.37	1.59	0.02	0	0.56	0.11	3.4	5.25	99.01
	391	TECO-30F, T17-13	ND	76.23	12.63	1.6	0.02	0.03	0.52	0.13	3.59	5.26	100.01
	4348	CHIN-1 T396-1	1998-10-21	76.87	12.3	1.56	0.03	0.03	0.54	0.11	3.55	5.02	100.01
	5638	JC-108-LT10 T563-3	2008-09-25	77.74	12.57	1.62	0.03	0.04	0.54	0.11	2.66	4.69	100
	2466	T89-5/6 #2B T215-8	1990-09-25	77.11	12.1	1.51	0.02	0.03	0.52	0.12	3.49	5.1	100
	5640	JC-108-LT37 T563-5	2008-09-25	77.71	12.58	1.63	0.03	0.03	0.54	0.11	2.66	4.72	100.01
	5312	CHAMA-1 T518-7	2004-08-24	76.73	12.44	1.45	0.02	0.05	0.52	0.12	3.65	5.02	100
	5645	JC-LT4-T1 T563-10	2008-09-25	77.54	12.57	1.64	0.02	0.03	0.54	0.11	2.79	4.76	100
	2768	#4079 T251-5	1992-02-27	76.6	12.18	1.64	0.02	0.03	0.55	0.11	3.59	5.27	99.99
	3495	JRK-DV-13 T323-5	1995-05-06	76.52	12.39	1.61	0.02	0.03	0.53	0.11	3.55	5.25	100.01
	1432	ORNA-1 T114-13	1985-12-12	76.99	12.31	1.57	0.02	0.05	0.53	0.11	3.44	4.99	100.01
	392	TECO-30G, T17-14	ND	76.75	12.66	1.72	0.03	0.03	0.55	0.13	2.78	5.36	100.01
	5313	CHAMA-2 T518-8	2004-08-24	76.69	12.4	1.55	0.03	0.04	0.53	0.11	3.58	5.07	100
	583	ORNA-1(2), T63-3	xx/xx/83	76.96	12.15	1.51	0.03	0.04	0.51	0.12	3.56	5.12	100
	2754	BUR-760.8	ND	76.48	12.28	1.79	0.02	0.05	0.56	0.12	3.32	5.37	99.99
	4700	REK-031194-1 T458-2	2001-02-12	77.04	12.17	1.55	0.02	0.04	0.54	0.11	3.49	5.03	99.99
	3685	JRK-DV-78 #2 T339-10	1996-11-01	76.59	12.48	1.53	0.03	0.03	0.53	0.11	3.38	5.33	100.01
	2074	CDH-D88-23 T172-5	1988-09-28	76.9	12.36	1.54	0.03	0.03	0.53	0.13	3.5	4.99	100.01
	2267	T190-2 CAES#1 626.5	1989-05-10	76.9	12.35	1.55	0.01	0.02	0.53	0.11	3.53	4.99	99.99
	253	P5-23 T23-1	ND	76.69	12.27	1.71	0.02	0.04	0.57	0.13	3.72	4.84	99.99
			Mean 40	76.6817	12.4032	1.59049	0.0229268	0.034878	0.54	0.118049	3.49415	5.09195	99.9773
			1 sigma	0.433358	0.216754	0.0611127	0.00782429	0.0116452	0.0153297	0.00678952	0.365007	0.314835	0.155081
28		Bishop Tuff, ash bed, ~774 Ka
	1029	FRIANT 9A T74-4	1984-06-22	77.42	12.57	0.71	0.03	0	0.44	0.07	3.86	4.91	100.01
	33	BT-8(2), T20-2	ND	77.48	12.68	0.71	0.03	0.02	0.45	0.06	3.85	4.72	100
	1021	O.L. 858.5 T75-9	1984-06-23	77.43	12.68	0.68	0.04	0.04	0.44	0.05	3.8	4.85	100.01
	5347	Th-1 (440') LoFe T524-8	2020-03-07	77.31	12.66	0.7	0.04	0.04	0.45	0.07	3.76	4.95	99.98
	3642	JRK-DV-42 T337-7	1996-03-01	77.63	12.6	0.72	0.03	0.03	0.44	0.06	3.78	4.7	99.99
	2937	OL92-1030 T272-4 JEOL	1993-03-03	76.94	12.91	0.74	0.04	0.03	0.44	0.07	3.9	4.93	100
	4825	TECO-36 T472-1	2001-12-14	77.32	12.67	0.69	0.03	0.05	0.43	0.08	3.78	4.95	100
	1278	BT-7 BULK 200SEC CTS T20-1	1985-07-01	77.57	12.48	0.73	0.02	0.05	0.43	0.07	3.88	4.78	100.01
	65	D77-2D, T31-6	ND	77.39	12.66	0.73	0.03	0.05	0.45	0.07	3.72	4.89	99.99
	1682	R-86-Y1 T134-5	1986-11-25	77.78	12.52	0.7	0.04	0.04	0.44	0.05	3.75	4.68	100
	5346	TH-1 (420') T524-7	2020-03-07	77.24	12.75	0.74	0.04	0.04	0.44	0.06	3.91	4.77	99.99
	2005	FLV-57-CS T166-7	1988-07-19	77.34	12.71	0.69	0.02	0.04	0.44	0.07	3.69	4.98	99.98
	1277	BT-8 (2) BULK T20-2	1985-07-01	77.75	12.48	0.73	0.03	0.05	0.44	0.05	3.82	4.65	100
	2939	OL92-1024 T273-4 JEOL	1993-03-03	76.86	13	0.7	0.03	0.03	0.44	0.05	4.04	4.85	100
	2462	SN-7 T215-4	1990-09-25	77.71	12.73	0.71	0.03	0.02	0.44	0.06	3.81	4.48	99.99
	2936	OL92-1029 T273-3 JEOL	1993-03-03	76.92	13.06	0.71	0.03	0.04	0.42	0.05	3.92	4.85	100
	4821	TECO-37 T471-7	2001-10-18	77.53	12.65	0.74	0.03	0.05	0.44	0.07	3.67	4.81	99.99
	2463	SN-8A T215-5	1990-09-25	77.92	12.6	0.71	0.03	0.02	0.44	0.05	3.86	4.37	100
	1892	YJC-1-87 T150-11	1987-11-09	77.28	12.91	0.73	0.04	0.05	0.44	0.07	3.74	4.75	100.01
	2941	OL92-1026 T273-6 JEOL	1993-03-03	76.96	12.93	0.69	0.03	0.03	0.45	0.08	3.97	4.87	100.01
	4854	EL-109-AV T474-3	2002-01-30	77.21	12.74	0.71	0.02	0.03	0.43	0.05	4.05	4.74	99.98
	3097	BT-14 T289-1	1993-09-24	77.21	12.78	0.75	0.03	0.04	0.43	0.06	3.77	4.92	99.99
	2480	FLV-133B-O T218-2	1990-11-19	77.4	12.93	0.72	0.03	0.03	0.44	0.06	3.69	4.71	100.01
	2944	OL92-1028 MAJ T273-8 JEOL	1993-03-03	76.89	12.97	0.73	0.04	0.04	0.45	0.06	3.97	4.85	100
	2940	OL92-1025	1993-03-03	76.86	12.99	0.68	0.04	0.02	0.45	0.08	3.92	4.96	100
	2938	OL92-1021 T273-1 JEOL	1993-03-03	76.91	13	0.72	0.03	0.03	0.45	0.06	4	4.81	100.01
	4550	KCAVV-1_POP1 T431-9	1990-05-12	77.66	12.68	0.72	0.03	0.02	0.43	0.05	3.64	4.77	100
	34	BT-11A1, T13-6		77.55	12.72	0.69	0.03	0.04	0.43	0.06	3.69	4.78	99.99
			Mean 28	77.3382	12.7521	0.713571	0.0317857	0.0346429	0.439643	0.0621429	3.83	4.79571	99.9979
			1 sigma	0.308666	0.168904	0.0192862	0.00611832	0.0123175	0.00792658	0.00994695	0.114633	0.139641	0.00956736
27A		Carlotta I ash bed, Wildcat Grade ash, 0.79 - 1.45 Ma
	3934	HW692-7 T358-8	1997-03-01	74.83	14.53	1.53	0.26	0.08	1.06	0.19	4.62	2.9	100
	1272	CARL-1(1) T8-4	1979-03-23	74.39	14.72	1.57	0.26	0.05	1.06	0.2	4.83	2.92	100
	44	CARL-1(2), T7-3, pd		73.76	15.24	1.59	0.21	0.06	1.06	0.22	4.94	2.92	100
	5995	Carl-1(3) T593-1	2013-09-23	73.72	14.96	1.55	0.25	0.07	1.08	0.21	5.28	2.87	99.99
	5996	Carl-1(C) T593-2 (pop1)	2013-09-23	73.86	14.98	1.53	0.25	0.07	1.06	0.21	5.19	2.85	100
	5998	Carl-1(E) T593-3	2013-09-23	73.81	14.96	1.56	0.26	0.08	1.06	0.21	5.23	2.83	100
	5930	DCE-DH-005-197.3 (B06)	2012-01-25	75.45	15.08	1.57	0.27	0.08	1.12	0.21	3.52	2.71	100.01
			Mean 6	74.26	14.9243	1.55714	0.251429	0.07	1.07143	0.207143	4.80143	2.85714	100
			1 sigma	0.666083	0.233371	0.0221467	0.019518	0.011547	0.0226779	0.0095119	0.613553	0.0734199	0.0057735
27		Ishi Tuff, ~2.5 Ma
	333	RS-2(1), T32-8	ND	77.76	12.74	0.82	0.14	0.02	0.75	0.15	3.5	4.12	100
	216	MILL-10, T30-5	ND	77.78	12.72	0.8	0.14	0.04	0.75	0.16	3.52	4.09	100
	5381	PU-16C (04) T527-9	7/12/200	78.28	12.69	0.81	0.15	0.04	0.75	0.15	3.25	3.88	100
	1799	DR87-12 T143-1	1987-06-24	78.15	12.37	0.83	0.14	0.04	0.76	0.14	3.75	3.82	100
	5379	PU-16A (04) T527-7	7/12/200	78.33	12.6	0.8	0.15	0.04	0.77	0.15	3.25	3.9	99.99
	302	PU-1, T18-1	ND	77.92	12.57	0.78	0.13	0.04	0.75	0.15	3.69	3.97	100
	334	RS-2(2), T34-6	ND	77.51	12.82	0.81	0.16	0.02	0.74	0.15	3.39	4.4	100
	217	MILL-10A, T30-6	ND	77.94	12.61	0.83	0.14	0.02	0.81	0.14	3.63	3.88	100
	4635	PU-1,7,9AVERAGE	ND	77.89	12.59	0.85	0.14	0.04	0.76	0.17	3.63	3.93	100
	663	KT-11A, T64-2	1983-09-06	78.47	12.16	0.86	0.14	0.04	0.77	0.16	3.59	3.81	100
	592	RS-2(3), T67-13	1983-11-18	77.97	12.48	0.85	0.14	0.05	0.78	0.13	2.81	4.78	99.99
	588	PU-1(2), T18-1(2)	06/xx/83	77.96	12.44	0.85	0.15	0.03	0.78	0.14	3.72	3.94	100.01
	1876	EH-UCD-PU-1 T148-9	1987-10-27	78.68	12.07	0.81	0.15	0.04	0.77	0.17	3.43	3.89	100.01
	5380	PU-16B (04) T527-8	7/12/200	78.31	12.57	0.87	0.16	0.04	0.78	0.16	3.32	3.8	100.01
	2541	PU-9B T224-8	1991-04-22	77.68	12.7	0.86	0.15	0.05	0.78	0.18	3.69	3.92	100.01
			Mean 15	78.042	12.542	0.828667	0.145333	0.0366667	0.766667	0.153333	3.478	4.00867	100.001
			1 sigma	0.32025	0.210347	0.0269568	0.00833809	0.009759	0.0179947	0.0134519	0.24909	0.262539	0.0063994
26		La Salida ash, ~3.06 Ma
	499	C-83-6A, T67-1	1983-11-18	72.5	14.47	2.73	0.27	0.11	0.89	0.29	5.39	3.36	100.01
	676	BUR-915, T59-B2	ND	72.02	14.46	2.67	0.26	0.11	0.87	0.33	5.66	3.63	100.01
	1587	61186-6 T129-4	1986-08-19	73.33	14	2.71	0.26	0.1	0.86	0.31	5.22	3.21	100
	2739	BUR-914.2	ND	72.8	15.42	2.85	0.28	0.1	0.87	0.31	3.54	3.84	100.01
	2740	BUR-915 HiFe	ND	73.05	14.13	2.75	0.25	0.1	0.86	0.32	4.52	4.01	99.99
	363	SSP-2, T19-9	ND	72.25	14.56	2.66	0.24	0.08	0.9	0.32	5.68	3.3	99.99
			Mean 6	72.6583	14.5067	2.72833	0.26	0.1	0.875	0.313333	5.00167	3.55833	100.002
			1 sigma	0.494749	0.497822	0.0688234	0.0141421	0.0109545	0.0164317	0.0136626	0.831923	0.321211	0.00983192
25		Nomlaki Tuff, ~3.34 Ma
	479	758-314, T15-4		77.71	13.03	1.03	0.19	0.03	0.93	0.22	3.55	3.3	99.99
	250	ORO-2(2), T8-10		77.07	13.3	1.04	0.19	0.03	0.92	0.23	3.85	3.37	100
	1084	PS 84 1TN T81-2	1984-09-04	77.89	12.53	1.03	0.19	0.04	0.95	0.21	3.62	3.54	100
	399	TS-18B, T15-9		78	13.02	0.97	0.19	0.02	0.96	0.23	3.37	3.24	100
	5945	MM-SFEI-8/95-PINOLE-BD31 T588-	2012-05-17	77.52	12.84	1.03	0.18	0.04	0.92	0.21	3.64	3.61	99.99
	125	GV-78-19, T15-13		77.36	12.75	1.1	0.19	0.03	0.93	0.22	3.92	3.5	100
	107	GPT-2, T7-14, pd		77.14	13.02	1.07	0.19	0.04	0.91	0.21	3.96	3.46	100
	5950	MM-USGS-J-1-98-SF-47 T588-4(po	2012-05-17	77.68	12.76	1.04	0.18	0.02	0.9	0.21	3.65	3.57	100.01
	482	758-324(2), T15-3		77.53	12.86	1.14	0.17	0.03	0.95	0.22	3.67	3.43	100
	5286	MNM-DV-14 T519-8	2004-08-24	77.33	12.83	1.07	0.19	0.04	0.95	0.2	3.72	3.68	100.01
	57	CM-17, T15-5		77.01	13.07	1.06	0.2	0.07	0.97	0.23	3.9	3.49	100
	397	TS-18A, pum., T15-7		77.08	13.26	1.06	0.18	0.03	0.97	0.24	3.7	3.48	100
	310	RBW-78-1339E, T11-5		77.27	12.97	1.02	0.18	0.03	1.03	0.21	3.71	3.57	99.99
	481	758-324(1), T19-10		77.26	12.75	1.06	0.18	0.02	0.98	0.22	3.99	3.53	99.99
	243	OLD COW-2, T27-3		77.52	12.52	1.03	0.17	0.02	0.93	0.22	3.91	3.68	100
	5792	TSN1(pop1)-UCD		77.25	12.98	1.09	0.21	0.07	1.03	0.22	3.68	3.48	100.01
	12	BACQ-82-2 (bulk), T46-3		77.7	12.84	0.99	0.18	0.03	1.04	0.2	3.63	3.39	100
	5947	MM-SFEI-8/95-RED ROCK-BC60 T58	2012-05-17	77.72	12.68	0.98	0.17	0.02	0.89	0.22	3.71	3.61	100
	522	FS-91, T56-2	1983-07-01	76.95	12.87	1.05	0.19	0.05	0.98	0.21	4.09	3.61	100
	5799	BH08SB_6(Poletski)		77.62	12.75	1	0.18	0.04	0.9	0.2	3.49	3.83	100.01
	582	OLIVE-1, T51-4	1983-02-01	77.16	12.81	1.06	0.18	0.03	0.98	0.21	3.95	3.6	99.98
	5707	JRK-DV-031208-2 T569-8(total)	2009-01-08	77.16	13.02	1.03	0.19	0.06	0.93	0.17	3.55	3.89	100
	5025	JRK-DV-214 T495-3	2003-03-17	77.11	12.92	1.06	0.18	0.04	0.91	0.21	3.45	4.11	99.99
	3982	JWH-031297-2 T364-1	1997-05-01	77.28	12.93	1.07	0.21	0.03	1.03	0.21	3.79	3.45	100
	4677	BH00SB-18A T457-8	2001-01-18	77.04	12.89	1.1	0.2	0.05	1.03	0.22	3.86	3.61	100
	657	82W14, T51-3	1983-02-01	77.18	12.66	1.1	0.18	0.05	0.97	0.22	4.07	3.58	100.01
	2863	AA-3 T264-2	1992-08-20	76.96	12.83	1.1	0.19	0.05	1	0.21	4.26	3.4	100
	2050	CAES#2 1644 T171-6	1988-09-05	78.18	12.63	1.09	0.18	0.04	0.99	0.2	3.65	3.04	100
	6518	18-RS-500 POP1 T631-4	2018-08-15	77	12.75	1.05	0.19	0.04	0.88	0.21	3.87	4.02	100.01
	5952	MM-USGS-J-1-98-SF-28 T588-7	2012-05-17	77.63	12.76	1	0.17	0.05	0.89	0.2	3.62	3.68	100
	1168	758-324 NOMLAKI T19-10	1984-12-24	77.48	12.47	1.07	0.2	0.04	0.99	0.21	4.03	3.51	100
	1182	OP84-193B t89-12	1985-02-28	77.28	12.77	1.09	0.19	0.05	0.98	0.19	4.07	3.38	100
	6517	18-RS-500 T631-4	2018-08-15	76.68	12.89	1.08	0.2	0.04	0.96	0.22	3.91	4.02	100
	1677	85 CG-21 T133-7	1986-10-21	78.36	11.96	0.96	0.19	0.02	1.05	0.21	3.76	3.47	99.98
	5479	CAES#1 829 T539-9	2006-05-25	77.44	12.7	1.04	0.18	0.05	0.9	0.19	3.56	3.94	100
	1911	CAES#CAES#1 829.0 T152-5	1988-02-10	77.55	12.48	1.06	0.19	0.03	0.97	0.19	3.92	3.61	100
	480	758-314D, T1-6, P		77.04	12.84	1.07	0.18	0.05	0.95	0.2	4.07	3.61	100.01
	21	BID-1, T7-5, pd		76.64	13.36	1.11	0.18	0.06	1.03	0.23	3.99	3.4	100
	5954	MM-USGS-J-1-98-SF-3 T588-8(pop	2012-05-17	77.77	12.71	1.02	0.17	0.04	0.87	0.19	3.64	3.58	99.99
	1844	FLV-21-WW T146-9	1987-08-25	77.21	12.88	1.1	0.22	0.05	0.99	0.21	3.97	3.36	99.99
	371	TBN-3, T1, N-ASW-106		77.79	12.29	1.1	0.2	0.05	0.99	0.24	3.79	3.55	100
	3848	758-322 T355-10	1997-01-01	77.54	12.8	1	0.17	0.03	0.86	0.2	3.73	3.67	100
			Mean 42	77.3831	12.809	1.05286	0.186667	0.0392857	0.956905	0.21119	3.79214	3.56786	99.999
			1 sigma	0.372582	0.251656	0.0410999	0.0116172	0.0131396	0.0501455	0.014177	0.199665	0.210893	0.0072615
24		Putah Tuff, ~3.34 Ma
	475	758-287A, T1-10, P		74.5	13.81	1.82	0.1	0.03	0.74	0.15	4.31	4.54	100
	5214	DW-160-GE T507-10	2003-12-16	74.82	13.68	1.8	0.09	0.02	0.73	0.15	3.84	4.87	100
	355	SM-ASH-09, T20-11		75.02	13.49	1.79	0.08	0	0.74	0.15	4.15	4.57	99.99
	3559	PVR-1 T329-5	1995-08-30	76.35	14.32	1.82	0.09	0.02	0.76	0.15	2.18	4.31	100
	5961	DWR-SJWD-2 T590-4	2012-05-17	74.88	13.84	1.8	0.09	0.02	0.75	0.16	3.76	4.69	99.99
	3554	PVR-3 T328-4	1995-08-30	74.55	13.77	1.8	0.09	0.03	0.73	0.14	3.85	5.05	100.01
	3930	758-271B T358-4	2019-03-09	74.74	13.91	1.8	0.08	0.03	0.8	0.15	4.22	4.28	100.01
	3928	758-236A minor 1sh t358-3	1997-03-01	74.9	13.78	1.73	0.09	0	0.71	0.15	4.33	4.31	100
	5255	MRM23-03 T512-5	2004-06-12	75.23	13.46	1.84	0.04	0.04	0.69	0.15	4.11	4.45	100.01
	466	758-157, T1-1, P		74.43	13.77	1.79	0.1	0.04	0.78	0.16	4.23	4.7	100
	478	758-292, T7-17, pd		74.9	13.92	1.76	0.09	0.03	0.72	0.14	4.06	4.36	99.98
	1843	FLV-20-WW T146-8	1987-08-25	74.98	13.62	1.77	0.11	0.03	0.72	0.14	4.03	4.61	100.01
	1367	T-1-85-KI T104-8	1985-08-26	75.28	13.47	1.73	0.08	0.02	0.74	0.14	3.61	4.92	99.99
	4988	SGW-TA1a T492-4	2003-01-11	75.02	13.53	1.74	0.09	0.01	0.75	0.14	4	4.71	99.99
	453	264-I-9, T14-4		74.55	13.71	1.87	0.08	0.05	0.7	0.16	4.18	4.69	99.99
	3532	TPSS-351 POP2 T326-6	1995-07-06	74.77	13.77	1.7	0.09	0.03	0.72	0.14	4.65	4.11	99.98
	3929	758-236A lofe T358-3	1997-03-01	77.49	14.41	1.86	0.11	0.05	0.74	0.14	0.6	4.6	100
	1017	MP-29 (597) T58-8	1984-05-30	75.08	13.46	1.8	0.1	0.03	0.74	0.13	4.09	4.58	100.01
	5127	DW-137-GE_POP1 T503-8	2003-09-02	76.06	13.46	1.98	0.07	0.04	0.7	0.15	2.5	5.03	99.99
	1473	WC-2B1 T117-7	1986-03-06	75.18	13.47	1.74	0.09	0.04	0.77	0.14	3.68	4.91	100.02
	5254	MRM16-03 T512-4	2004-06-12	74.85	13.53	1.95	0.05	0.04	0.78	0.14	3.83	4.82	99.99
	1406	T-1-85-KI (2) T110-11	1985-09-24	75.3	13.36	1.77	0.08	0.01	0.73	0.13	3.86	4.75	99.99
			Mean 22	75.1309	13.7064	1.80273	0.0859091	0.0277273	0.738182	0.145455	3.73045	4.63	99.9977
			1 sigma	0.697621	0.270441	0.0676955	0.016521	0.0141192	0.0278835	0.00857864	0.892858	0.252982	0.01066
23		Tuff of Monticello Rd., ash flow, 4.45 Ma
	3846	758-207C T355-8	1997-01-01	75.76	13.12	1.61	0.07	0.02	0.54	0.14	3.68	5.07	100.01
22		Tuff of Danville, ~4.8 Ma (4.37 Ma)
		DEN HARTOG #3-26-89-6, Etchegoin Fm.
	483	758-328(1), T7-18, pd		78.42	13.01	1.02	0.16	0.03	0.82	0.19	4.04	2.31	100
	484	758-328(2), T15-2, low total		78.27	12.94	1.03	0.15	0	0.85	0.19	3.8	2.76	99.99
	677	MP-23, T59-B3	xx/xx/xx	77.18	12.65	0.99	0.16	0.04	0.87	0.19	3.27	4.66	100.01
	2199	FLV-119-WW LT. COL. GLS. T183-	1989-01-25	76.88	12.96	1.07	0.16	0.05	0.89	0.19	3.4	4.41	100.01
	1554	T-4-86 KI T126-12	1986-07-17	78.12	12.47	1.01	0.16	0.04	0.86	0.17	3.49	3.68	100
	2747	BUR-996		78.38	12.45	1.02	0.18	0.06	0.87	0.19	3.17	3.66	99.98
	2476	DEN HARTOG #3-26-89-6 T217-3	1990-10-23	77.03	12.31	1	0.16	0.04	0.84	0.17	3.18	5.27	100
	241	OH-2A ( poor match for EMA, but see fig. _)	T7-7	76.95	13.21	0.93	0.13	0.05	0.82	0.18	3.53	4.19	99.99
			Mean 8	77.6538	12.75	1.00875	0.1575	0.03875	0.8525	0.18375	3.485	3.8675	99.9975
			1 sigma	0.698896	0.323243	0.0397986	0.0138873	0.0180772	0.0249285	0.00916125	0.305894	0.980084	0.010351
21		Tuff of Napa, Healdsburg tuff, ~4.7 Ma
	4030	DE-HB-3 T369-5	1997-09-01	73.78	14.4	3.18	0.1	0.09	0.99	0.18	4.17	3.11	100
	4031	DE-HB-5 T369-6	1997-09-01	73.64	14.32	3.25	0.1	0.08	0.96	0.19	4.22	3.24	100
	3786	COLLINSVILLE J-22 T350-1	1996-12-01	72.82	14.12	3.25	0.1	0.08	1	0.19	5.36	3.09	100.01
	5112	MRM55-02 T500-2	2003-06-23	72.83	14.36	3.18	0.1	0.08	1.01	0.2	4.53	3.7	99.99
	5602	DW-06-KW-07 T557-4	2008-02-29	73.87	15.04	3.21	0.1	0.09	0.95	0.2	3.59	2.95	100
	5772	DW-183-GE-08 T569-5	2009-01-08	72.24	14.76	3.18	0.1	0.08	0.97	0.19	5.05	3.43	100
	3966	970213-1 T361-8 (2)	1997-04-01	73.01	13.88	3.17	0.1	0.08	0.98	0.2	5.47	3.11	100
	5604	DW-10-KW-07 T557-6	2008-02-29	73.21	15.18	3.23	0.11	0.1	0.99	0.2	3.74	3.25	100.01
	4095	DE-HB-4 T376-3	1998-01-01	72.19	14.24	3.18	0.1	0.07	0.97	0.19	5.88	3.18	100
	5136	DW-147-GE T504-1	2003-09-02	72.55	14.43	3.25	0.1	0.09	0.96	0.2	4.92	3.49	99.99
	4972	JA2002-A T490-3	2002-11-12	72.42	14.54	3.3	0.1	0.06	1	0.18	5.64	2.76	100
	3932	970213-1 T358-6	1997-03-01	73.08	14.11	3.11	0.1	0.07	0.99	0.22	5.02	3.31	100.01
	3845	758-198 T355-7	1997-01-01	72.47	14.34	3.33	0.1	0.08	0.95	0.2	5.47	3.05	99.99
	4028	758-199A T369-3	1997-09-01	73.75	14.53	3.14	0.07	0.07	0.92	0.17	4.09	3.27	100.01
	5438	MRM 31-05 T533-3	2005-12-19	72.35	14.4	3.16	0.09	0.08	0.97	0.2	5.52	3.22	99.99
	4412	JP-UNM-4 T405-9B (hiFe)	1999-03-29	71.84	14.57	3.29	0.1	0.09	0.99	0.21	5.52	3.39	100
	5603	DW-09-KW-07 T557-5	2008-02-29	73.83	15.01	3.3	0.11	0.08	0.97	0.21	3.32	3.19	100.02
	3844	758-192 T355-6	1997-01-01	73	14.35	3.16	0.08	0.07	0.86	0.18	5.21	3.08	99.99
	4581	MRM26-99 T435-7	2000-03-02	72.45	14.32	3.23	0.09	0.07	1.01	0.21	4.92	3.69	99.99
	1531	HEALDSBURG LOC. 3 T124-4	1986-05-05	72.23	14.39	3.25	0.11	0.09	0.98	0.21	5.1	3.64	100
	5212	DW-159-GE T507-8	2003-12-16	71.9	14.43	3.23	0.09	0.08	0.96	0.2	5.78	3.34	100.01
	472	758-199, T1-15, P		72.15	14.63	3.23	0.09	0.08	0.93	0.21	5.36	3.32	100
	5210	DW-157-GE T507-6	2004-04-20	72.07	14.54	3.19	0.11	0.06	1.03	0.21	5.12	3.67	100
			Mean 23	72.7687	14.4735	3.21739	0.0978261	0.0791304	0.971304	0.197826	4.91304	3.28174	100
			1 sigma	0.654428	0.302589	0.056102	0.00951388	0.0099604	0.0354586	0.0124157	0.728912	0.243211	0.00824525
20		Huichica Tuff, 4.76 Ma
	138	H-1, T3,4		73.56	14.62	2.29	0.09	0.06	1.05	0.19	4.44	3.7	100
	456	758-84, T1-12, P		73.35	14.47	2.29	0.1	0.05	1.09	0.18	4.83	3.65	100.01
	457	758-86, T7-15		74.18	14.46	2.27	0.11	0.06	1.03	0.18	4.14	3.57	100
	3444	92SgSJE-83 Major T319-10	1995-02-25	73.29	14.46	2.35	0.09	0.04	1.07	0.18	4.96	3.64	100.08
	146	JCD-1(1), T19-6		73.65	14.32	2.25	0.08	0.03	1.06	0.17	4.39	4.04	99.99
	3525	H-2 T326-1	1995-07-06	73.52	14.41	2.21	0.08	0.05	1.03	0.15	4.52	4.03	100
	148	JCD-1(3), T19-7		73.48	14.35	2.16	0.07	0.04	1.08	0.16	4.5	4.16	100
	147	JCD-1(2), T3,4, N-ASW-17		73.55	14.82	2.14	0.08	0.05	1.02	0.17	4.06	4.11	100
	4617	JPW_4-15-00-1 T441-4	2000-06-29	74.45	14.33	2.33	0.09	0.06	1.08	0.16	4.35	3.15	100
			Mean 9	73.67	14.4711	2.25444	0.0877778	0.0488889	1.05667	0.171111	4.46556	3.78333	100.009
			1 sigma	0.387427	0.160191	0.0721303	0.0120185	0.0105409	0.0254951	0.012693	0.289746	0.329242	0.0271314
19		Lawlor Tuff, 4.834 Ma
	460	758-141A(1), T1-5, P		73.02	14.36	2.2	0.1	0.05	0.88	0.18	4.66	4.55	100
	222	MLG-4, T12-4		73.22	14.43	2.17	0.1	0.03	0.88	0.18	4.93	4.05	99.99
	3524	LAWLOR-2 T325-10	1995-07-06	73.1	14.32	2.21	0.1	0.04	0.86	0.17	4.79	4.41	100
	579	MLG-3(2), T12-3(2)	1982-12-09	73.45	14.16	2.19	0.1	0.04	0.89	0.17	4.87	4.13	100
	5401	LAWLOR-1 T530-7	2005-09-07	73.78	14.07	2.13	0.1	0.05	0.85	0.18	4.66	4.19	100.01
	5535	LAWLOR AVR 43		73.79	14.23	2.17	0.1	0.04	0.89	0.17	4.44	4.18	100.01
	5369	IMP95-03 T526-4	2020-05-31	75.78	14.42	2.14	0.1	0.05	0.88	0.19	3.6	2.84	100
	462	758-141C, T19-3		72.95	14.81	2.19	0.1	0.02	0.85	0.17	4.76	4.14	99.99
	5454	DW-174-06-GE T538-3	2006-04-13	74.97	14.29	2.18	0.1	0.03	0.85	0.17	2.98	4.43	100
	4964	MO2AM-110B T489-7	2002-10-26	74.38	14.21	2.16	0.1	0.05	0.91	0.17	4.46	3.55	99.99
	485	758-329, T7-19, pd, low total		75.7	14.65	2.18	0.1	0.03	0.85	0.19	4.01	2.29	100
	5545	HTH-4 T546-2	2007-03-07	74.02	14.19	2.11	0.1	0.04	0.85	0.19	4.62	3.88	100
	5452	DW-171-06-GE T538-1	2006-04-13	74.52	14.22	2.17	0.1	0.06	0.88	0.16	3.38	4.52	100.01
	188	KT-7(2), T5-2		73.65	14.3	2.16	0.09	0.04	0.91	0.18	4.69	3.98	100
	2120	WC-B4B (SILICIC) T175-13	1988-10-28	73.12	14.67	2.13	0.1	0.05	0.89	0.2	4.21	4.64	100.01
	5051	MRM9-02 T497-2	2003-04-23	73.73	14.15	2.18	0.1	0.05	0.86	0.16	4.59	4.18	100
	465	758-156C, T19-5		73.53	14.31	2.14	0.09	0.03	0.91	0.18	4.65	4.16	100
	5261	MRM43-03 T513-1	2004-06-12	73.68	14.27	2.21	0.1	0.05	0.92	0.16	4.35	4.26	100
	3523	LAWLOR-1 T325-9	1995-07-06	73.2	14.29	2.15	0.09	0.04	0.84	0.18	4.83	4.37	99.99
	3787	COLLINSVILLE J-28 T350-2	1996-12-01	73.67	14.03	2.2	0.1	0.04	0.91	0.16	4.59	4.32	100.02
	461	759-141A(2), T19-2		73.43	14.26	2.16	0.09	0.04	0.88	0.17	3.67	5.3	100
	473	758-218E, T1-14, P		73.26	14.44	2.17	0.11	0.07	0.9	0.19	4.68	4.18	100
	2125	WC-B4A T176-7	1988-10-27	73.54	14.13	2.17	0.09	0.05	0.88	0.19	4.06	4.88	99.99
	5257	MRM35-03 T512-7	2004-06-12	73.84	14.26	2.04	0.1	0.05	0.92	0.17	4.27	4.33	99.98
	486	758-338, T1-3, P		73.8	14.46	2.21	0.11	0.05	0.86	0.17	5.36	2.97	99.99
	186	KT-6, T6-2,		74.3	13.59	2.24	0.09	0.05	0.89	0.18	4.61	4.05	100
	580	MLG-4(2), T12-4(2)	1982-12-09	73.6	14.15	2.2	0.09	0.04	0.86	0.17	4.83	4.05	99.99
	5284	M03-18 T519-10	2004-08-24	74.09	14.12	2.17	0.1	0.04	0.84	0.16	4.54	3.92	99.98
	187	KT-7(1), T6-3		74.01	13.49	2.22	0.1	0.04	0.94	0.17	4.77	4.25	99.99
	5262	MRM45-03 T513-2	2004-06-12	73.87	14.22	2.16	0.09	0.04	0.89	0.17	4.52	4.03	99.99
	221	MLG-3, T12-3		73.63	14.24	2.15	0.09	0.02	0.87	0.17	4.87	3.96	100
	3057	GV93-1 T283-8	1996-07-23	73.49	14.2	2.03	0.1	0.04	0.83	0.17	5.06	4.09	100.01
	1727	TRY-2 T137-9	1987-04-23	74.13	13.82	2.12	0.1	0.05	0.89	0.16	3.91	4.83	100.01
	5683	HTH-081 T567-4	2009-01-08	74.11	14.56	2.18	0.1	0.05	0.87	0.15	4.64	3.36	100.02
	231	MONT-1, T9-2		73.56	14.04	2.17	0.09	0.06	0.9	0.19	4.62	4.36	99.99
	3847	758-218 T355-9	1997-01-01	73.74	14.41	2.24	0.1	0.04	0.9	0.15	4.3	4.12	100
	2121	WC-B4B (MAFIC) T17	1988-10-28	73.28	14.57	2.06	0.09	0.04	0.92	0.18	4.14	4.73	100.01
	456	758-84, T1-12, P		73.35	14.47	2.29	0.1	0.05	1.09	0.18	4.83	3.65	100.01
	3551	MRT-2 T328-1	1995-08-30	73.43	14.34	2.16	0.09	0.03	0.87	0.16	4.31	4.6	99.99
	2157	WC-B3B T177-12	1988-12-07	73.79	13.92	2.17	0.09	0.07	0.93	0.17	4.3	4.55	99.99
	5546	HTH-5 T546-3	2007-03-07	74.08	14.2	1.99	0.09	0.04	0.88	0.17	4.93	3.63	100.01
	2183	WC-B3B DK GLS T180-7	1988-12-22	73.74	14.11	2.12	0.08	0.05	0.87	0.17	4.07	4.8	100.01
			Mean 42	73.7936	14.2471	2.16167	0.0966667	0.0438095	0.886667	0.173095	4.46095	4.13595	99.9995
			1 sigma	0.605643	0.252889	0.055958	0.00611542	0.0108093	0.0415356	0.0113671	0.464489	0.554516
18A		Collinsville ash
	3788	COLLINSVILLE J-36 T350-3	1996-12-01	75.71	13.58	1.35	0.11	0.03	1.01	0.1	3.65	4.46	100
	2536	BEC-3 T224-3	1991-04-22	75.55	13.84	1.35	0.08	0.04	0.89	0.08	3.81	4.36	100
	2757	BEC-3 T250-2	1992-02-26	75.73	13.3	1.37	0.1	0.04	0.9	0.07	4.1	4.39	100
	2489	BEC-3-PUMICE T219-9	1990-12-21	76.12	13.6	1.28	0.12	0.02	0.87	0.07	3.42	4.49	99.99
	2537	BEC-4 R224-4	1991-04-22	75.41	13.91	1.35	0.1	0.04	0.9	0.09	3.85	4.36	100.01
			Mean 5	75.704	13.646	1.34	0.102	0.034	0.914	0.082	3.766	4.412	100
			1 sigma	0.266421	0.24162	0.034641	0.0148324	0.00894427	0.0550454	0.0130384	0.251853	0.0597495	0.00707107
18		Roblar Tuff, ~6.2 Ma
	5377	758-105A, T-18-3	2020-07-12	75.9	13.68	1.46	0.07	0.03	0.6	0.11	2.91	5.23	99.99
	458	758-105, T18-3		75.18	13.67	1.45	0.05	0.03	0.58	0.1	3.85	5.09	100
	55	CDMG 180-81, T26-8		75.24	13.49	1.51	0.06	0.03	0.59	0.12	4.48	4.48	100
	5310	MRM015B-04 T517-2	2004-08-24	75.24	13.59	1.43	0.07	0.02	0.58	0.12	4.31	4.63	99.99
	53	CDMG 178-81, T26-6		74.8	13.99	1.47	0.06	0.04	0.62	0.12	4.5	4.4	100
	50	CDMG 175-81, T26-3		75.3	13.36	1.47	0.06	0.02	0.57	0.12	4.32	4.78	100
	467	758-169G, T1-8, P		74.83	13.69	1.48	0.07	0.03	0.58	0.12	4.32	4.89	100.01
	49	CDMG 174-81, T26-2		75.11	13.54	1.46	0.07	0.01	0.57	0.13	4.56	4.55	100
	5211	DW-151-GE T507-7	2003-12-16	75.18	13.71	1.48	0.07	0.02	0.57	0.11	4.33	4.54	100.01
	5382	MRM 25-04 T523-4	2020-03-07	75	13.6	1.45	0.06	0.01	0.58	0.11	4.65	4.53	99.99
	5311	MRM015A-04 T517-3	2004-08-24	75.1	13.66	1.43	0.07	0.03	0.58	0.12	4.15	4.86	100
	361	SP-5, T19-13		75.27	13.65	1.51	0.07	0.01	0.62	0.11	4.39	4.37	100
	90	DSDP-34-8-6, T48-1		75.04	13.61	1.49	0.07	0.03	0.6	0.14	4.45	4.57	100
	54	CDMG 179-81, T26-7		75.18	13.55	1.49	0.06	0.03	0.61	0.14	4.35	4.59	100
	51	CDMG 176-81, T26-4		74.98	13.8	1.43	0.06	0.02	0.56	0.14	4.52	4.49	100
	4980	JA080402B T491-4	2003-01-11	75.63	13.36	1.39	0.06	0.01	0.58	0.12	3.96	4.86	99.97
	5299	MRM 12-04 T520-10	2004-12-21	75.57	13.51	1.46	0.06	0.03	0.57	0.11	3.97	4.73	100.01
	4931	DW-SP-8-2001 T486-3	2002-10-26	75.67	13.84	1.52	0.06	0.03	0.58	0.13	4.31	3.85	99.99
	52	CDMG 177-81, T26-5		74.93	13.53	1.51	0.07	0.03	0.56	0.1	4.58	4.69	100
	1932	DW-SPB-R-1 T163-2	1988-05-14	75.17	13.56	1.51	0.07	0.03	0.59	0.14	4.17	4.76	100
	4659	MRM00-19 T444-5	2000-11-03	75.52	13.59	1.49	0.07	0.03	0.6	0.12	3.67	4.91	100
	48	CDMG 173-81, T26-1		74.93	13.6	1.54	0.07	0.03	0.59	0.15	4.36	4.74	100.01
	4979	JA080402A T491-3	2003-01-11	75.41	13.51	1.52	0.07	0.03	0.6	0.13	3.83	4.9	100
	4961	JPW-2-9-02-1 T489-4	2002-10-26	75.65	13.65	1.52	0.07	0.02	0.6	0.11	3.72	4.67	100.01
	4930	DW-SP-7-2001 T486-2	2002-10-26	75.9	13.8	1.56	0.07	0.03	0.6	0.12	4.65	3.28	100.01
	4772	758-369(UR) T465-5	2001-07-18	75.26	13.36	1.44	0.06	0.02	0.57	0.11	3.9	5.27	99.99
	4785	JPW-6-30-00-2B T466-9	2001-07-23	75.59	13.4	1.46	0.07	0.02	0.56	0.11	3.66	5.13	100
			Mean 26	75.2569	13.6008	1.47962	0.0653846	0.0246154	0.585	0.121154	4.22923	4.63692	99.9996
			1 sigma	0.286227	0.151972	0.0395455	0.00581774	0.00811456	0.0172627	0.013062	0.310508	0.394185	0.00870897
17		Tuff with rock fragments of Vitt (1936)
	487	758-339CR, T1-4, P		75.82	13.93	1.61	0.19	0.04	0.83	0.2	4.09	3.29	100
	1552	SIMP-3 T126-10	1986-07-17	77.19	13.5	1.59	0.17	0.04	0.85	0.2	3.19	3.26	99.99
	4778	JPW-6-30-00-1B T465-8	2001-07-23	76.27	13.73	1.53	0.17	0.03	0.82	0.19	4	3.26	100
	4786	JPW-6-30-00-2C T466-10	2001-07-23	75.99	13.49	1.55	0.17	0.04	0.78	0.18	3.16	4.64	100
	492	758-373, T18-2		74.92	13.58	1.51	0.15	0	0.82	0.19	3.59	5.24	100
			Mean 5	76.038	13.646	1.558	0.17	0.03	0.82	0.192	3.606	3.938	99.998
			1 sigma	0.818639	0.185553	0.0414729	0.0141421	0.0173205	0.0254951	0.0083666	0.436383	0.939053	0.00447214
		PINOLE TUFF COMPLEX, 16-12, ~6.3 Ma
16		Heterogenous tuff w/ scoria bombs, mafic
	4773	758-369(2)B T465-6	2001-07-18	53.18	17.39	9.26	6.86	0.17	11.25	1.5	4.12	0.53	104.26
	4944	DW-GE T487-7	2002-10-26	51.18	15.4	9.83	6.56	0.18	11.2	1.44	3.79	0.43	100.01
			Mean 2	52.18	16.395	9.545	6.71	0.175	11.225	1.47	3.955	0.48	102.135
15		Heterogenous tuff w/scoria bombs, silicic 1
	5378	758-109A T527-6	7/12/200	73.58	14.57	2.88	0.21	0.08	1.12	0.26	3.6	3.71	100.01
	4926	MRM9-01B T484-1	2002-10-26	74.47	14.37	2.87	0.22	0.05	1.14	0.25	2.42	4.22	100.01
	5277	MRM36-04 T517-4	2004-08-24	72.53	14.57	3.01	0.22	0.06	1.17	0.27	3.2	4.96	99.99
	4777	758-369(2)S_all T465-7	2001-07-23	71.53	14.56	2.67	0.2	0.07	1.01	0.26	4.67	5.03	100
	4880	MRM-38C-01 T476-8	2002-04-02	73.13	13.8	2.93	0.2	0.06	1.17	0.29	4.55	3.86	99.99
	1553	T-2-86 KI LOW K FRACT T126-11	1986-07-17	73.06	14.22	2.92	0.23	0.08	1.08	0.29	4.71	3.41	100
			Mean 6	73.05	14.3483	2.88	0.213333	0.0666667	1.115	0.27	3.85833	4.19833	100
			1 sigma	0.988393	0.30354	0.114193	0.0121106	0.0121106	0.061563	0.0167332	0.941433	0.670326	0.00894427
15		Heterogenous tuff w/scoria bombs, silicic 2
	4774	758-369(2)S_pop1 T465-7	2001-07-23	71.6	14.17	2.98	0.09	0.08	0.84	0.24	4.72	5.29	100.01
	5260	MRM40-03 T512-10	2004-06-12	72.44	14.53	2.98	0.09	0.08	0.94	0.21	5.53	3.19	99.99
			Mean 2	72.02	14.35	2.98	0.09	0.08	0.89	0.225	5.125	4.24	100
14		Heterogenous tuff w/scoria bombs, silicic 3
	4775	758-369(2)S_pop2 T465-7	2001-07-23	69.75	15.67	3.1	0.46	0.07	1.74	0.38	4.88	3.94	99.99
	4771	MRM-00-35 T465-4	2001-07-18	69.82	15.61	3.08	0.46	0.07	1.75	0.38	4.81	4.01	99.99
			Mean 2	69.785	15.64	3.09	0.46	0.07	1.745	0.38	4.845	3.975	99.99
13		Heterogenous tuff w/ scoria bombs, silicic 4
	4776	758-369(2)S_pop3 T465-7	2001-07-23	72.59	14.13	2.17	0.09	0.08	0.62	0.19	4.41	5.72	100
	5335	DW-35-Na-04B T23-7	2005-03-07	73.54	14.48	2.28	0.09	0.05	0.63	0.18	3.44	5.32	100.01
			Mean 2	73.065	14.305	2.225	0.09	0.065	0.625	0.185	3.925	5.52	100.005
12		Rodeo Tuff, ~6.3 Ma
	468	758-178B, T1-13, P		71.27	14.39	3.56	0.09	0.08	1.09	0.23	5.79	3.49	99.99
	489	758-365(1), T1-2, P		71.89	15.17	3.53	0.1	0.07	1.07	0.23	2.82	5.12	100
	490	758-365(2), T18-4		72.06	14.9	3.55	0.11	0.05	1.09	0.22	3.03	4.97	99.98
	3925	758-104 (a) T358-1	1997-03-01	73.24	14.73	3.48	0.11	0.07	1.09	0.22	2.08	4.99	100.01
	5279	MRM40-04 T517-6	2004-08-24	71.45	14.43	3.47	0.05	0.1	1.1	0.25	5.82	3.34	100.01
	5376	758-104B T527-4	7/12/200	71.46	14.75	3.35	0.11	0.08	1.05	0.23	4.23	4.74	100
	3931	758-374 T358-5	1997-03-01	71.87	14.46	3.39	0.11	0.08	1.06	0.24	3.48	5.31	100
	5334	DW-35-Na-04A T523-6	2005-03-07	72.11	14.88	3.42	0.12	0.06	1.1	0.24	4.54	3.53	100
	3673	758-232 #2 T339-1	1996-11-01	73.08	15.03	3.53	0.12	0.08	1.11	0.24	3.02	3.79	100
	3660	758-232 T339-1	1996-11-03	73.48	15.02	3.5	0.11	0.09	1.12	0.22	2.83	3.65	100.02
	491	758-368, T18-12		73.46	13.18	3.62	0.11	0.07	1.03	0.24	5.38	2.91	100
	470	758-190A, T1-11, P		71.44	14.53	3.88	0.12	0.1	1.01	0.25	5.65	3.02	100
			Mean 12	72.2342	14.6225	3.52333	0.105	0.0775	1.07667	0.234167	4.05583	4.07167	100.001
			1 sigma	0.844947	0.522392	0.135669	0.0193061	0.0148477	0.0333939	0.0108362	1.35075	0.884676	0.00996205
11		McGuire Pk upper ash, in Briones Fm., ~9 Ma
		ash in Modelo Fm., ash in Purisima Fm.
	2402	MGP-16 T206-6	1990-05-15	76.07	12.95	1.33	0.21	0.03	0.84	0.27	3.54	4.77	100.01
	1591	MOD-6 T130-2	1986-09-19	76.26	12.71	1.33	0.2	0.03	0.86	0.27	3.66	4.67	99.99
	5156	MOD-6 T130-2(2)	2003-09-02	75.98	13.05	1.36	0.2	0.04	0.85	0.28	3.41	4.84	100.01
	2398	PU-17 T206-2	1990-05-15	76.89	13.31	1.27	0.21	0.03	0.85	0.25	4.1	3.08	99.99
	2371	PU-17 T201-2	1989-10-12	77.09	13.55	1.31	0.19	0.04	0.84	0.25	3.2	3.53	100
			Mean 5	76.458	13.114	1.32	0.202	0.034	0.848	0.264	3.582	4.178	100
			1 sigma	0.501069	0.325085	0.0331662	0.0083666	0.00547723	0.0083666	0.0134164	0.336036	0.814905	0.01
10		Rheem Tuff, Contra Costa Fm, correlates ? w/
		Volanic Neck, nr. Roblar, Sonoma Co., ~10 Ma
	3089	92CB-3673 T288-2	1993-08-24	79.35	12.92	0.96	0.05	0.02	0.44	0.08	4.38	1.79	99.99
	2543	RQ-2 T225-2	1991-04-22	77.2	12.52	1.06	0.03	0.02	0.44	0.08	3.71	4.95	100.01
			Mean 2	79.35	12.92	0.96	0.05	0.02	0.44	0.08	4.38	1.79	99.99
9		Black Diamond Park ash in unnamed forma-
		tion abvove Neroly, ~10 Ma
	463	758-141E, T20-8		75.63	12.05	2.37	0.11	0.02	0.81	0.34	2.66	6.01	100
	2810	M91GC-33 T257-2	1992-05-14	75.35	12.29	2.33	0.13	0.04	0.81	0.34	2.7	6.01	100
	4139	qe-6 (perkins)		75.98	11.97	2.39	0.12	0.03	0.81	0.33	2.12	6.25	100
	1774	QE-6 T141-9	1987-05-27	75.97	12.03	2.29	0.14	0.04	0.8	0.34	2.43	5.96	100
	1345	BE-251 (?) T106-9	1985-08-29	75.46	12.13	2.38	0.1	0.04	0.85	0.34	1.99	6.71	100
	1782	QC-3 T140-15	1987-05-27	75.52	12.12	2.35	0.13	0.04	0.83	0.35	2.58	6.08	100
	2395	M89TH-37 T205-5	1990-04-17	75.81	12.14	2.36	0.1	0.03	0.8	0.32	2.75	5.69	100
	1048	ALCAN-1 T79-7	1984-07-27	75.94	12.02	2.18	0.12	0.04	0.81	0.34	2.42	6.13	100
	4640	JMZ-PV-D T442-4	2000-08-03	76.03	12.28	2.28	0.12	0.04	0.81	0.35	1.65	6.44	100
	1327	BE-18 T105-6	1985-08-29	75.8	11.99	2.28	0.12	0.04	0.83	0.35	2.2	6.39	100
	3449	1-8-156JB T319-5	1995-02-25	75.39	12.22	2.4	0.12	0.04	0.82	0.32	2.87	5.83	100.01
	3561	TC90-20 (47)		75.39	12.06	2.35	0.1	0.03	0.81	0.31	2.7	6.24	99.99
			Mean 12	75.6892	12.1083	2.33	0.1175	0.0358333	0.815833	0.335833	2.4225	6.145	100
			1 sigma	0.260784	0.108446	0.0628129	0.0128806	0.00668558	0.0144338	0.0131137	0.365268	0.280859	0.00426401
8		Alves 2 ash at Neroloy/Cierbo Fms. contact;
		CPT XI ash, 11.31 Ma
	2058	ALVES-1 T170-6	1988-09-03	76.33	12.12	2.08	0.05	0.03	0.65	0.23	3.24	5.28	100.01
	2414	GREFCO-1 T208-7	1990-05-24	76.88	12.18	2.08	0.05	0.03	0.63	0.23	2.81	5.1	99.99
	2089	ALVES-1 (2) T173-12	1988-10-06	77.06	12.12	2.05	0.05	0.03	0.65	0.22	2.7	5.12	100
	6326	GREFCO-1 T615-1	2016-08-01	78.26	12.72	2.01	0.04	0.06	0.65	0.23	1.64	4.37	99.98
	1335	BE-26 T105-14	1985-08-29	75.95	11.97	2	0.06	0.03	0.62	0.22	1.82	7.33	100
	3569	TC89-27c	(perkins)	76.61	11.96	2.02	0.05	0.03	0.61	0.21	2.31	6.19	99.99
			Mean 6	76.8483	12.1783	2.04	0.05	0.035	0.635	0.223333	2.42	5.565	99.995
			1 sigma	0.796377	0.279744	0.0352136	0.00632456	0.0122474	0.0176068	0.00816497	0.613743	1.04205	0.0104881
7		Alves 1 ash in middle part of the Cierbo Fm.;
		Coal Valley ash, 11.51 Ma
	3557	MRT-3A T329-3 - Cierbo, SW side Mt. Diblo	1995-08-30	78.73	13.58	0.58	0.08	0.07	0.54	0.09	2.31	4.02	100
	3558	MRT-3A T329-3 - Cierbo, SW side Mt. Diblo	1995-08-30	78.67	13.58	0.58	0.08	0.07	0.54	0.09	2.34	4.05	100
	5366	NA-30C T526-8 - Naples Bech, S. Calif., Mont.	2020-05-31	78.46	13.08	0.54	0.09	0.07	0.55	0.09	2.18	4.93	99.99
	3023	2379-1JA T280-2 - NW Nevada	1993-06-14	76.99	13.12	0.54	0.07	0.06	0.55	0.09	3.39	5.2	100.01
	5365	NA-51A T526-7 - Naples Beach, S. Calif., Mont.	2020-05-31	78.55	13.1	0.52	0.09	0.07	0.53	0.09	2.23	4.83	100.01
	3085	920609-2 T287-6 - Cierbo, NE side Mt. Diablo	1993-08-24	77.97	13.25	0.55	0.08	0.06	0.54	0.1	2.83	4.61	99.99
	1337	BE-25 T106-2 - Aldrich Sta., Nev.	1985-08-29	77.14	12.68	0.56	0.07	0.07	0.54	0.1	1.4	7.44	100
			Mean 7	78.0729	13.1986	0.552857	0.08	0.0671429	0.541429	0.0928571	2.38286	5.01143	100
			1 sigma	0.732501	0.314241	0.0221467	0.00816497	0.0048795	0.00690066	0.0048795	0.612637	1.15769	0.00816497
6		La Serena Rd. ash in Cierbo Fm. near
		Alamo, upper; Browns Hill ash, 11.66 Ma
	3090	92CB-3677 T288-1	1993-08-24	76.9	12.97	0.86	0.12	0.06	0.57	0.15	3.3	5.07	100
	4145	i88-48 (perkins)		77.3	12.51	0.87	0.13	0.05	0.58	0.15	2.94	5.47	100
	3392	2-96-43J T314-6	1995-01-09	77.11	12.45	0.89	0.13	0.05	0.57	0.16	2.95	5.74	100.05
			Mean 3	77.1033	12.6433	0.873333	0.126667	0.0533333	0.573333	0.153333	3.06333	5.42667	100.017
5		La Serena Rd. ash in Cierbo Fm., near Alamo;
		lower; Bear Cr. Ash; Rainier Mesa ash, 11.72 Ma
	3087	92CB-3676 T287-8	1993-08-24	77.77	13.07	0.61	0.05	0.06	0.37	0.09	2.97	5	99.99
	5153	DPB-14 T22-5(2)	2003-09-02	78.22	12.97	0.61	0.05	0.06	0.38	0.09	3.13	4.49	100
	4146	i88-47 (perkins)		77.08	12.46	0.6	0.06	0.06	0.37	0.08	2.32	6.97	100
	4630	ALAMO-1 T441-5	2000-06-29	77.76	12.85	0.62	0.06	0.06	0.4	0.12	3.02	5.12	100.01
	6521	RW-BCR-1 T631-1	2018-08-15	76.79	13.8	0.68	0.06	0.05	0.42	0.12	2.71	5.37	100
	1341	BE-62 T106-5	1985-08-29	77.36	12.59	0.58	0.05	0.06	0.4	0.11	1.81	7.04	100
	2445	DPB-14 T211-5	1990-08-14	77.87	13.14	0.58	0.06	0.07	0.39	0.09	3.34	4.45	99.99
			Mean 7	77.55	12.9829	0.611429	0.0557143	0.06	0.39	0.1	2.75714	5.49143	99.9986
			1 sigma	0.496387	0.436948	0.0338765	0.00534522	0.0057735	0.0182574	0.0163299	0.529708	1.08519	0.00690066
4		Tesla Rd. ash; Aldrich Hill 2 ash, 12.01 Ma
	6299	Cierbo-Tesla-1 M T612-2	2016-05-09	78.73	12.85	0.82	0.07	0.07	0.46	0.14	2.35	4.51	100
	1342	BE-15-A1 T106-6	1985-08-29	77.12	12.52	0.82	0.06	0.07	0.48	0.14	2.68	6.11	100
	4149	i88-88 (perkins)		76.56	12.44	0.86	0.07	0.07	0.46	0.14	2.32	7.07	99.99
	5962	BE-15A1 T590-6	2012-05-17	76.87	12.74	0.87	0.07	0.07	0.48	0.14	2.49	6.26	99.99
	6300	Cierbo-Tesla-1 NM T612-3	2013-05-09	77.35	12.62	0.82	0.07	0.08	0.48	0.13	3.81	4.65	100.01
			Mean 5	77.326	12.634	0.838	0.068	0.072	0.472	0.138	2.73	5.72	99.998
			1 sigma	0.837992	0.164864	0.0248998	0.00447214	0.00447214	0.0109545	0.00447214	0.620282	1.10399	0.0083666
3		McGuire Peaks, lower ash in Briones Fm., 13.4 Ma
	2400	MGP-14A T206-4	1990-05-15	77.56	12.7	0.68	0.09	0.04	0.54	0.11	2.98	5.3	100
	2401	MGP-14C T206-5	1990-05-15	77.48	12.72	0.67	0.1	0.05	0.52	0.11	3.06	5.28	99.99
			Mean 2	77.52	12.71	0.675	0.095	0.045	0.53	0.11	3.02	5.29	99.995
2		Tephra Layer N-6, Valley Springs Fm., 28.9 Ma
	2117	N-6 T175-10	1988-10-28	77.13	13.06	0.92	0.05	0.07	0.52	0.09	2.76	5.39	99.99
	127	GV-78-21, T15-15		77.16	12.94	0.92	0.06	0.06	0.52	0.08	3.07	5.18	99.99
	120	GV-77-3, T15-11		77.13	12.78	0.91	0.06	0.07	0.52	0.08	3.01	5.44	100
	134	GV-78-34A, T16-7		77.1	12.88	0.92	0.04	0.05	0.51	0.08	3.04	5.38	100
	117	GV-76-C16, T22-1		76.93	12.75	0.9	0.05	0.06	0.59	0.09	3.38	5.25	100
			Mean 5	77.09	12.882	0.914	0.052	0.062	0.532	0.084	3.052	5.328	99.996
			1 sigma	0.0919239	0.125379	0.00894427	0.0083666	0.0083666	0.0327109	0.00547723	0.220839	0.10849	0.00547723
1		Kirker Tuff, Mt. Diablo, E.Diablo Range, 29.1 Ma,
	3033	KIRK-1 crse T281-8	1993-06-22	76.1	12.48	2.16	0.01	0.07	0.72	0.14	3	5.32	100
	3395	94CB 4054 T316-1	1995-01-06	75.71	12.56	2.1	0.01	0.07	0.73	0.14	3.44	5.25	100.01
	3034	KIRK-1 fine T281-8	1993-06-22	76.33	12.54	2.15	0.01	0.06	0.73	0.13	2.77	5.29	100.01
	136	GV-80-11(2), T22-2		76.57	12.6	2.18	0.01	0.04	0.71	0.15	2.83	4.91	100
	1927	87-35-SUJ T158-15	1988-03-16	76.09	12.33	2.15	0.01	0.07	0.72	0.15	2.57	5.91	100
	3916	SUJ95-28 SJANECKE		76.59	12.19	2.24	0.01	0.06	0.73	0.14	2.04	5.99	99.99
	135	GV-80-11(1), T30-2		76.94	12.57	2.2	0.01	0.05	0.69	0.16	2.44	4.95	100.01
			Mean 8	76.3329	12.4671	2.16857	0.01	0.06	0.718571	0.144286	2.72714	5.37429	100.003
			1 sigma	0.406641	0.151626	0.0441318	0	0.011547	0.0146385	0.009759	0.442407	0.42567	0.00755929
1?	133	GV-78-31, T16-6		76.77	12.82	1.86	0.04	0.02	0.75	0.13	2.88	4.73	100
